# Supplementary material
Source: ML conference proceedings conference paper supplement (https://openaccess.thecvf.com/content/WACV_2020/html/Van_Etten_City-Scale_Road_Extraction_WACV_2020_paper.html)
Supplement: Supplementary file 1 [file Van_Etten_City-Scale_Road_Extraction_WACV_2020_supplemental.pdf]

# City-Scale Road Extraction from Satellite Imagery v2: Road Speeds and Travel Times - Supplemental Material

Adam Van Etten  
In-Q-Tel CosmiQ Works  
avanetten@igt.org

## Appendix A. Road Speed Assignment

See [4] for details on the precise labeling guidelines and road type definitions. We utilize road type (motorway, primary, secondary, tertiary, residential, unclassified, cart track) and road surface type (paved, non-paved) to assign speed to each edge.

Speed is assigned with Table 1, using the Oregon guidelines for road speed [3].

Table 1: Road Speeds (mph)

| Road Type    | 1 Lane | 2 Lane | 3+ Lane |
|--------------|--------|--------|---------|
| Motorway     | 55     | 55     | 65      |
| Primary      | 45     | 45     | 55      |
| Secondary    | 35     | 35     | 45      |
| Tertiary     | 30     | 30     | 35      |
| Residential  | 25     | 25     | 30      |
| Unclassified | 20     | 20     | 20      |
| Cart Track   | 20     | 20     | 20      |

For each non-paved roadway, the speed from Table 1 is multiplied by 0.75 to give the final speed.

## Appendix B. Large Area Test Data

Details of the large are testing regions for SpaceNet data are shown in Table 2, and an example test area displayed in Figure 1.

Table 2: Test Regions

| Test Region | Area<br>(Km <sup>2</sup> ) | Road Length<br>(Total Km) |
|-------------|----------------------------|---------------------------|
| Khartoum_0  | 3.0                        | 76.7                      |
| Khartoum_1  | 8.0                        | 172.6                     |
| Khartoum_2  | 8.3                        | 128.9                     |
| Khartoum_3  | 9.0                        | 144.4                     |
| Las.Vegas_0 | 68.1                       | 1023.9                    |
| Las.Vegas_1 | 177.0                      | 2832.8                    |
| Las.Vegas_2 | 106.7                      | 1612.1                    |
| Paris_0     | 15.8                       | 179.9                     |
| Paris_1     | 7.5                        | 65.4                      |
| Paris_2     | 2.2                        | 25.9                      |
| Shanghai_0  | 54.6                       | 922.1                     |
| Shanghai_1  | 89.8                       | 1216.4                    |
| Shanghai_2  | 87.5                       | 663.7                     |
| Total       | 608.0                      | 9064.8                    |

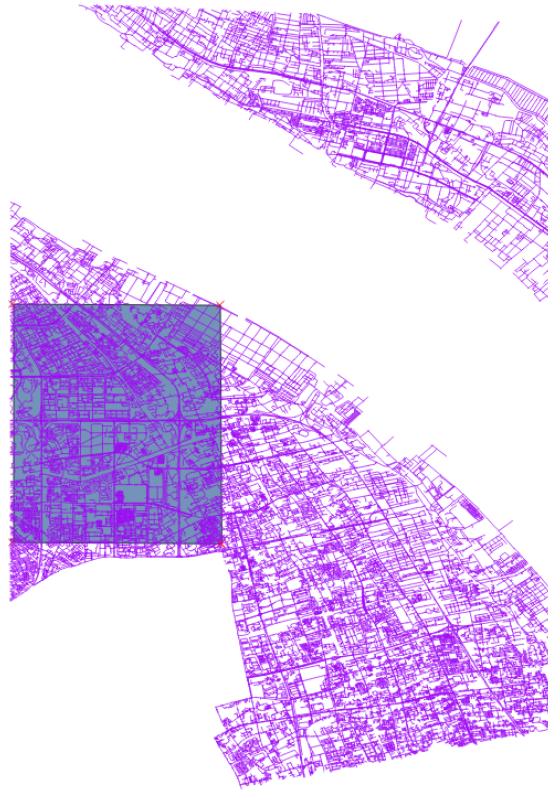

Figure 1: SpaceNet road vector labels over Shanghai (purple). The label boundary is discontinuous and irregularly shaped, so we define rectangular regions for testing purposes (e.g. the blue region denotes test region Shanghai\_0).

## Appendix C. OSM / SpaceNet Model Comparison

Figure 2 displays comparisons of models trained on OSM data and SpaceNet data.

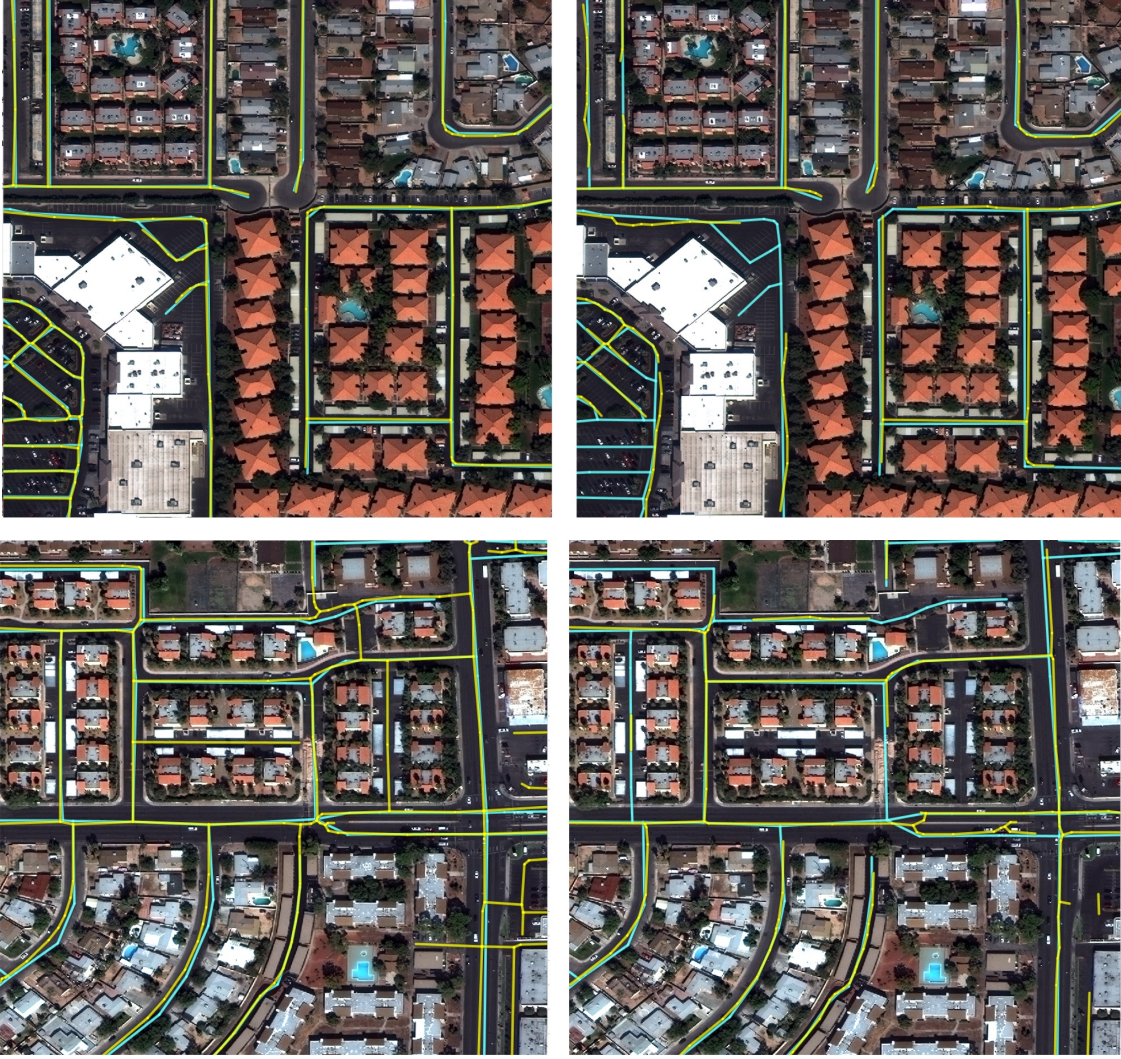

Figure 2: **SpaceNet compared to OSM.** Road predictions (yellow) and ground truth SpaceNet labels (blue) for a sample image chips, with SpaceNet models on the left and OSM-trained models on the right. Top: SpaceNet model predictions (left) score  $\text{APLS}_{\text{length}} = 0.60$ , while OSM model predictions (right) yield  $\text{APLS}_{\text{length}} = 0.48$ . Bottom: SpaceNet model predictions (left) score  $\text{APLS}_{\text{length}} = 0.92$ , while OSM model predictions (right) yield  $\text{APLS}_{\text{length}} = 0.37$ .



## Appendix D. CRESIV2 Road Speed Plots

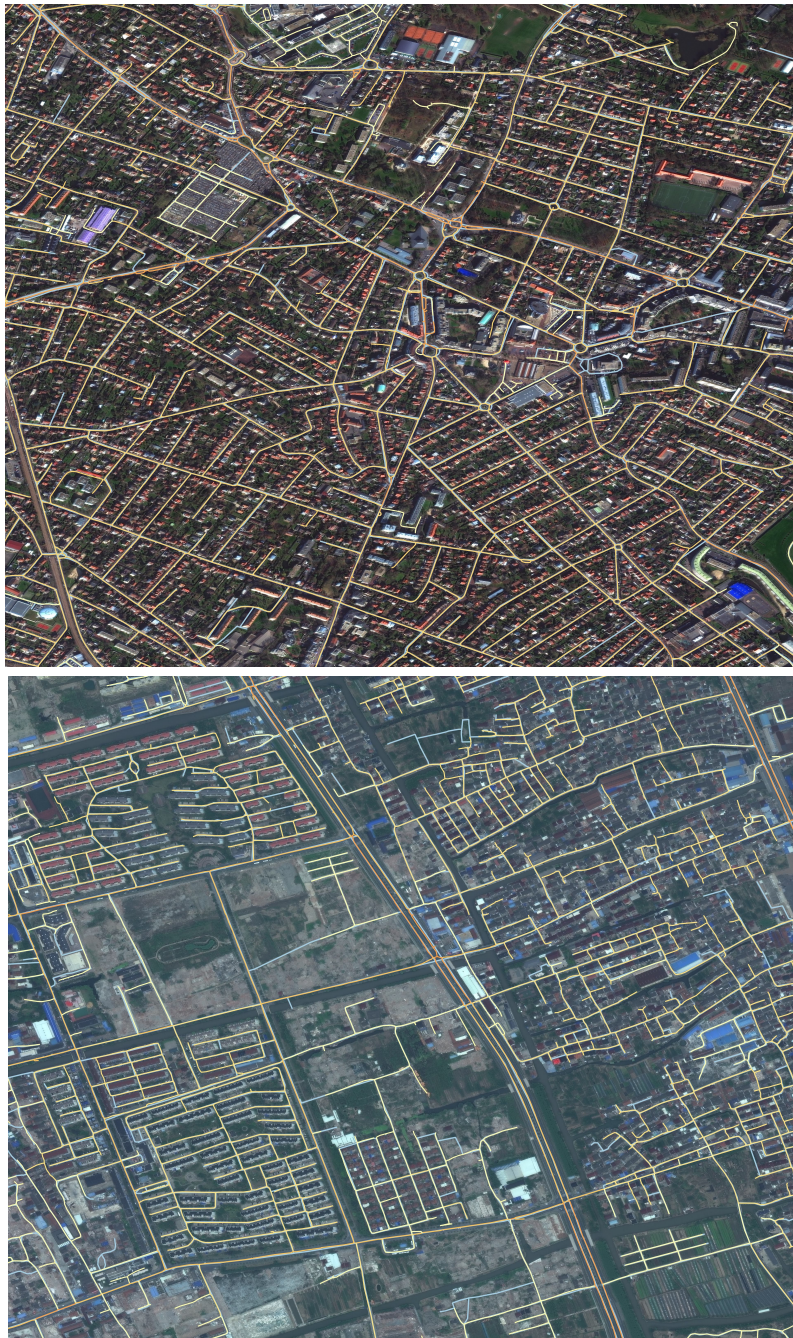

Figure 3: **Road speed.** Output of CRESIV2 inference as applied to large SpaceNet test regions (from top: Paris, Shanghai). Roads are colored by inferred speed limit, from yellow (20 mph) to red (65 mph), with ground truth in gray.



## Appendix E. CRESIv2 / RoadTracer Visual Comparison

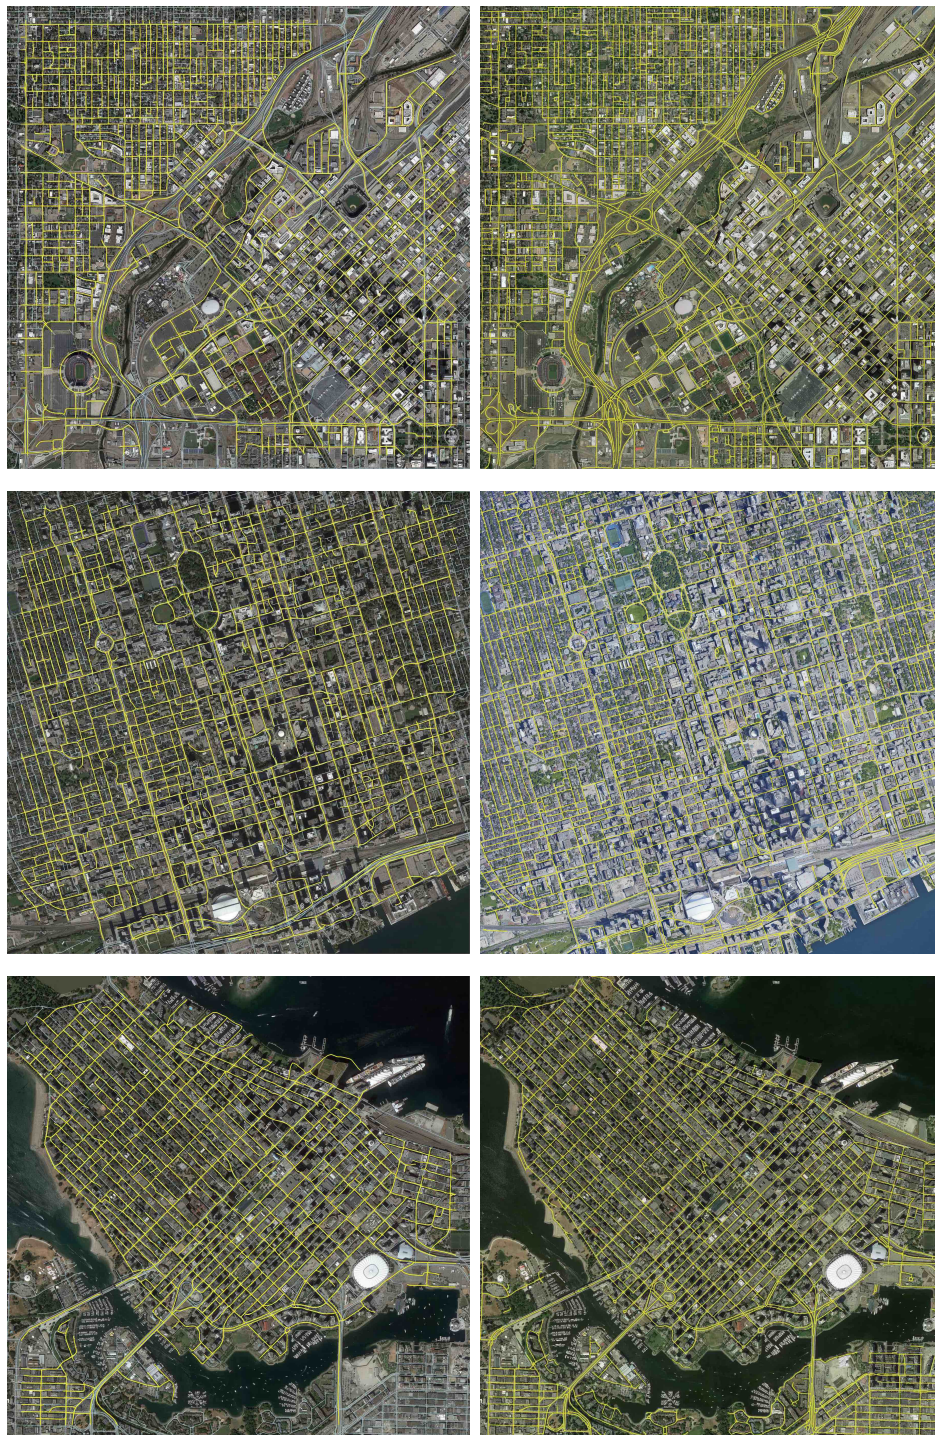

Figure 4: **RoadTracer** / **CRESIv2**. Performance comparison between RoadTracer (left column, OSM labels in gray, predictions in yellow [2]) and CRESIv2 (right column, predictions in yellow) for various cities. From top: Denver, Toronto, Vancouver.



## Appendix F. RoadTracer / CRESIv2 / DeepRoadMapper Zooms

A qualitative comparison of three methods over various cities is shown in Figure 5.

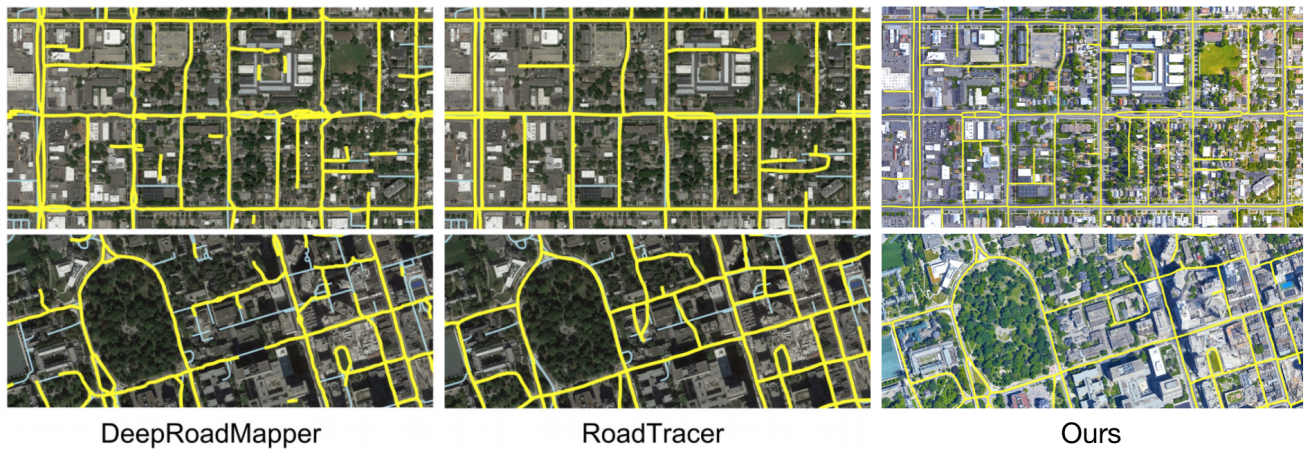

Figure 5: Qualitative comparison of three methods over various cities, (see Figure 10 of [1]).



## References

- [1] F. Bastani, S. He, M. Alizadeh, H. Balakrishnan, S. Madden, S. Chawla, S. Abbar, and D. DeWitt. RoadTracer: Automatic Extraction of Road Networks from Aerial Images. In *Computer Vision and Pattern Recognition (CVPR)*, Salt Lake City, UT, June 2018.
- [2] M. CSAIL. Roadtracer: Automatic extraction of road networks from aerial images. <https://roadmaps.csail.mit.edu/roadtracer/>, 2018.
- [3] OpenStreetMap. Osm tags for routing/maxspeed. [https://wiki.openstreetmap.org/wiki/OSM\\_tags\\_for\\_routing/Maxspeed/#United\\_States\\_of\\_America](https://wiki.openstreetmap.org/wiki/OSM_tags_for_routing/Maxspeed/#United_States_of_America), 01 2019.
- [4] A. Van Etten, D. Lindenbaum, and T. M. Bacastow. SpaceNet: A Remote Sensing Dataset and Challenge Series. *ArXiv e-prints*, July 2018.
